# Supplementary material for: Bacterial Microcompartment-Mediated Ethanolamine Metabolism in Escherichia coli Urinary Tract Infection
Source: PubMed Central journal article supplement (PMC6652756; doi:10.1128/iai.00211-19), 2019-07-23
Supplement: IAI.00211-19-s0001.pdf [file IAI.00211-19-s0001.pdf]

## Supplementary Data: Dadswell et al

| <b>Table of Contents</b>                                                                                                                                                                                 | <b>Page</b> |
|----------------------------------------------------------------------------------------------------------------------------------------------------------------------------------------------------------|-------------|
| <b>Tables</b>                                                                                                                                                                                            |             |
| <b>Table S1. Primers used in this study</b>                                                                                                                                                              | <b>2</b>    |
| <b>Table S2. Competitive index of <i>eut</i> operon mutant strains grown in co-culture with the wild-type in AUM with 10mM ethanolamine.</b>                                                             | <b>3</b>    |
| <b>Supplementary Figures</b>                                                                                                                                                                             |             |
| <b>Figure S1. Proinflammatory cytokines detected in infected urine.</b>                                                                                                                                  | <b>4</b>    |
| <b>Figure S2. Utilisation of ethanolamine as a nitrogen source in minimal medium by urine isolates of <i>E.coli</i></b>                                                                                  | <b>5-7</b>  |
| <b>Figure S3. Comparison of utilisation of ethanolamine as a nitrogen and carbon source for selected urinary isolates of <i>E. coli</i> in a microtitre plate assay</b>                                  | <b>8</b>    |
| <b>Figure S4. RT-PCR shows upregulation of the <i>E. coli</i> U1 <i>eut</i> operon in AUM with addition of ethanolamine and does not show polarity of single gene <i>eutB</i> or <i>eutE</i> mutants</b> | <b>9</b>    |
| <b>Figure S5. Scanty bacterial microcompartments are visible in <i>E. coli</i> U1 when grown in M9 with ethanolamine</b>                                                                                 | <b>10</b>   |
| <b>Figure S6. <i>In vitro</i> growth advantage of UPEC strain U1 conferred by physiological levels of ethanolamine</b>                                                                                   | <b>11</b>   |
| <b>Figure S7. Inactivation of <i>eut</i> operon genes does not reduce competitiveness of <i>E. coli</i> UPEC strain U1 in artificial urine medium containing 0.5 mM or less ethanolamine</b>             | <b>12</b>   |
| <b>Figure S8. Acetate is present in infected urine</b>                                                                                                                                                   | <b>13</b>   |

**Table S1. Primers used in this study**

| <b>Name</b>               | <b>Sequence 5'-3'</b>     | <b>Source</b>  |
|---------------------------|---------------------------|----------------|
| <b>Colony PCR Primers</b> |                           |                |
| KD13_K1                   | CAGTCATAGCCGAATAGCCT      | Baba et al (1) |
| KD13_K2                   | CGGTGCCCTGAATGAACTGC      | Baba et al (1) |
| eutR_L                    | TTGTTGGCGCTGTTAACATC      | This study     |
| eutR_R                    | GGCGGGCTGTTCTTTGATGA      | This study     |
| eutB_L3                   | TACCCTTTCGCTCTCTGGCAG     | This study     |
| eutB_R3                   | AGTGATCGGCCAGGAAACGCA     | This study     |
| eutE_L                    | ATTGTCGATGAGGTGGTGTC      | This study     |
| eutE_R                    | TGGTTACACAGCGTTGCC        | This study     |
| eutRin_L                  | TCGTTCTGGTTTGGCATTCC      | This study     |
| eutRin_R                  | GACGGCTTCTCGGAAAACAG      | This study     |
| eutBin_L                  | ATGTGCTGAGCGATGAAACC      | This study     |
| eutBin_R                  | CCCATGATGTAGTTGCAGCC      | This study     |
| eutEin_L                  | ATTGCTGCCATTCGTGAAGC      | This study     |
| eutEin_R                  | ATGTTCTGCGGTGGTTCCA       | This study     |
| <b>qPCR Primers</b>       |                           |                |
| EC_gyrA_L                 | GCAGGATCGCAGTGATAGC       | This study     |
| EC_gyrA_R                 | GTCGTCCGATCGTCAACC        | This study     |
| EC_rrsA_pL5_L             | GACGATCCCTAGCTGGTCTG      | This study     |
| EC_rrsA_pL5_R             | CGTAGGAGTCTGGACCGTGT      | This study     |
| EC_eutB_pL_34_L           | CGCGGAGTTCAACCGTAT        | This study     |
| EC_eutB_pL_34_R           | CAGAGCCTTGTCGGTTTC        | This study     |
| EC_eutR_pL_74_L           | TGTCTATGAACATGCTTTAACGATT | This study     |
| EC_eutR_pL_74_R           | CGGATGCAGCTGATCGTA        | This study     |
| EC_eutS_pL_153_L          | CACACTGGCGCATCTCAT        | This study     |
| EC_eutS_pL_153_R          | CCGGGAGTTAGCGTCATAAT      | This study     |
| EC_eutE_pL_23_L           | AGAACGGACCGTGCATTG        | This study     |
| EC_eutE_pL_23_L           | GGTGATGGTCATGGTGGTC       | This study     |

**Table S2. Competitive index of *eut* operon mutant strains grown in co-culture with the wild-type in AUM with 10mM ethanolamine.**

| Co-cultured Strains | Incubation time (Hours) |      |       |      |      |      |      |
|---------------------|-------------------------|------|-------|------|------|------|------|
|                     | 12                      | 24   | 24(I) | 28   | 32   | 36   | 48   |
| U1/U1Δ <i>eut</i> B | 0.51                    | 0.72 | 0.42  | 0.52 | 0.19 | 0.42 | 0.40 |
| U1/U1Δ <i>eut</i> E | 0.36                    | 0.48 | 0.36  | 0.40 | 0.28 | 0.24 | 0.26 |

CI is calculated as described in Methods and Supplementary Methods. All values are below 0.8. 24 (I) indicates that the bacteria were subcultured. Values are Means of N=3.

Supplementary Figures

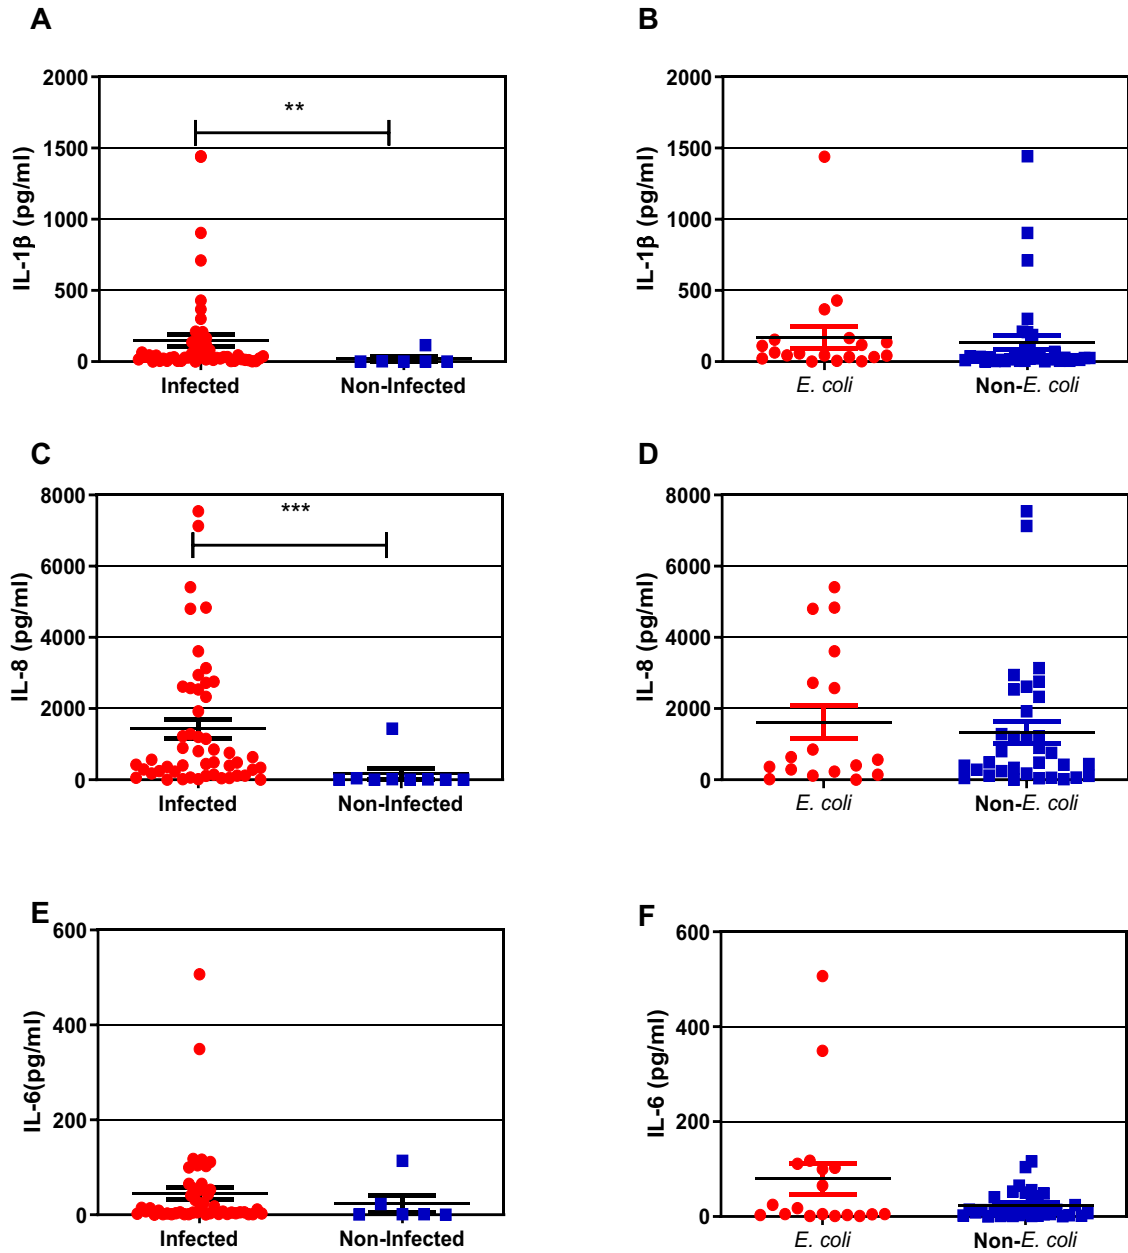

**Figure S1. Pro-inflammatory cytokines detected in infected urine**

**A,B** IL-1 $\beta$  **C,D** IL-8 **E,F** IL-6. **A,C,E** infected urine (n=52) compared to non-infected urine (n=12). **B,D,F** *E. coli* infected urine (n=19) and non *E. coli* infected urine (n=28).

Compared by Mann Whitney-U \*\* p $\leq$ 0.01 \*\*\* p $<$ 0.001

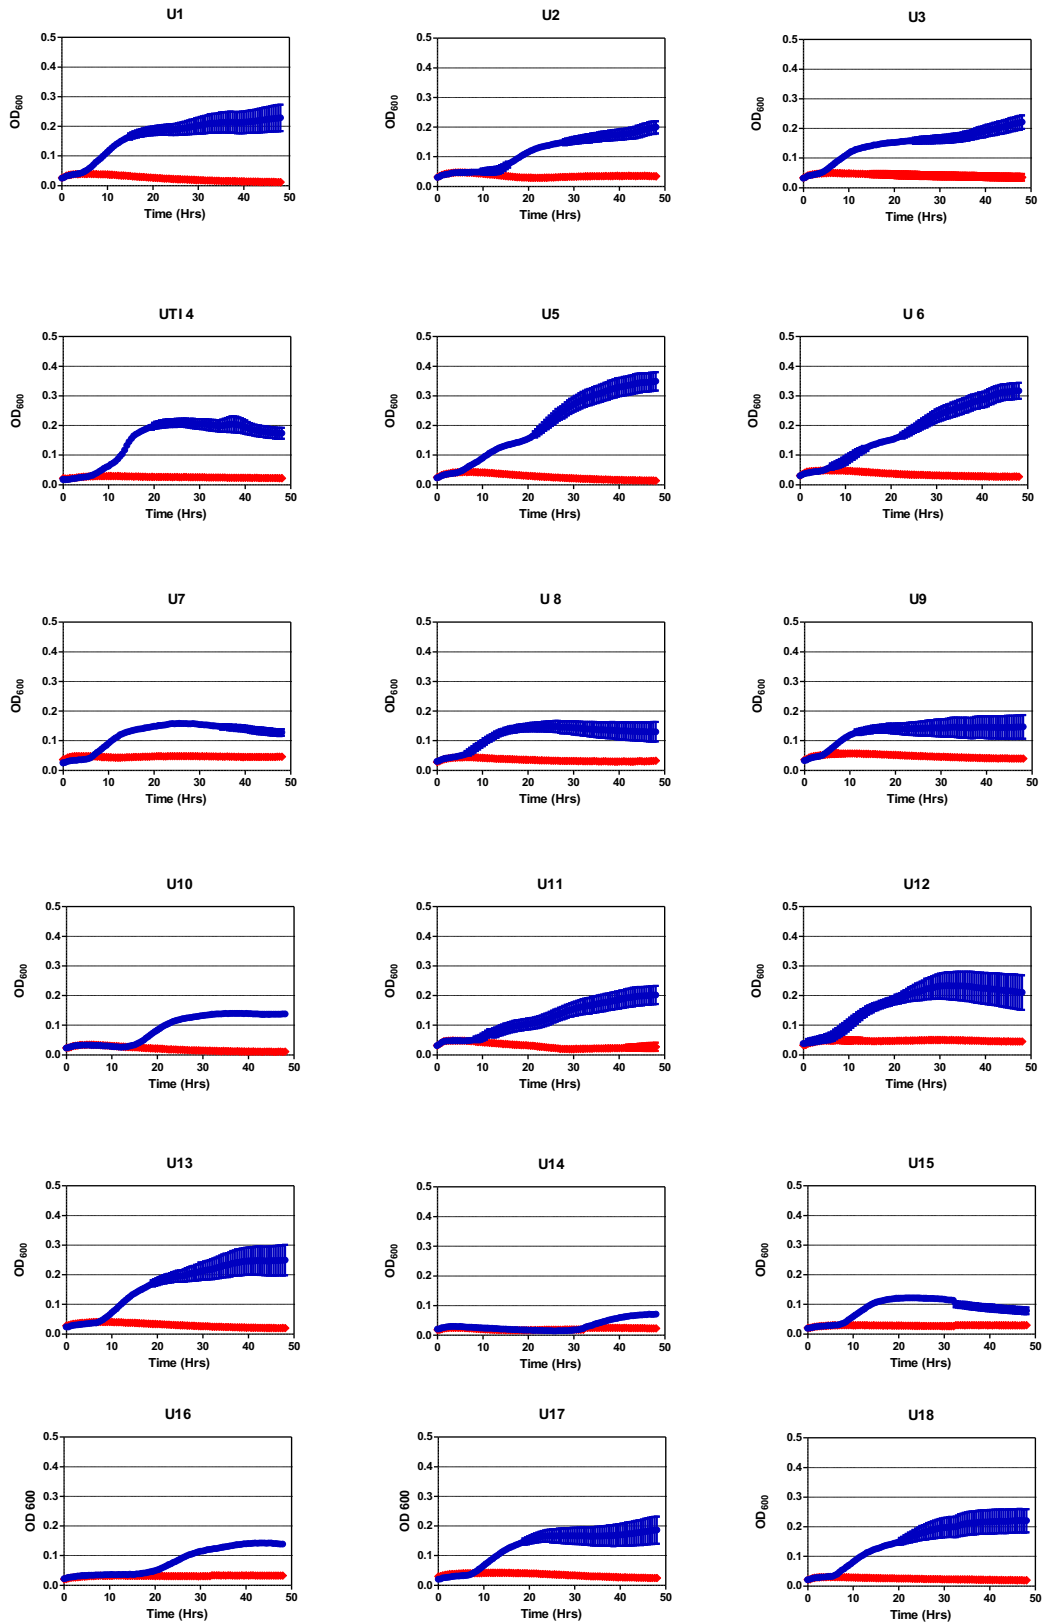

**Figure S2. Utilisation of ethanolamine as a nitrogen source in minimal medium by urine isolates of *E. coli***

Automated growth curve of UPEC isolates U1-U79 grown in ammonia-free modified M9 (red) and ammonia-free modified M9 supplemented with 10mM Ethanolamine as nitrogen source. Values are Mean  $\pm$  SEM. N=3.

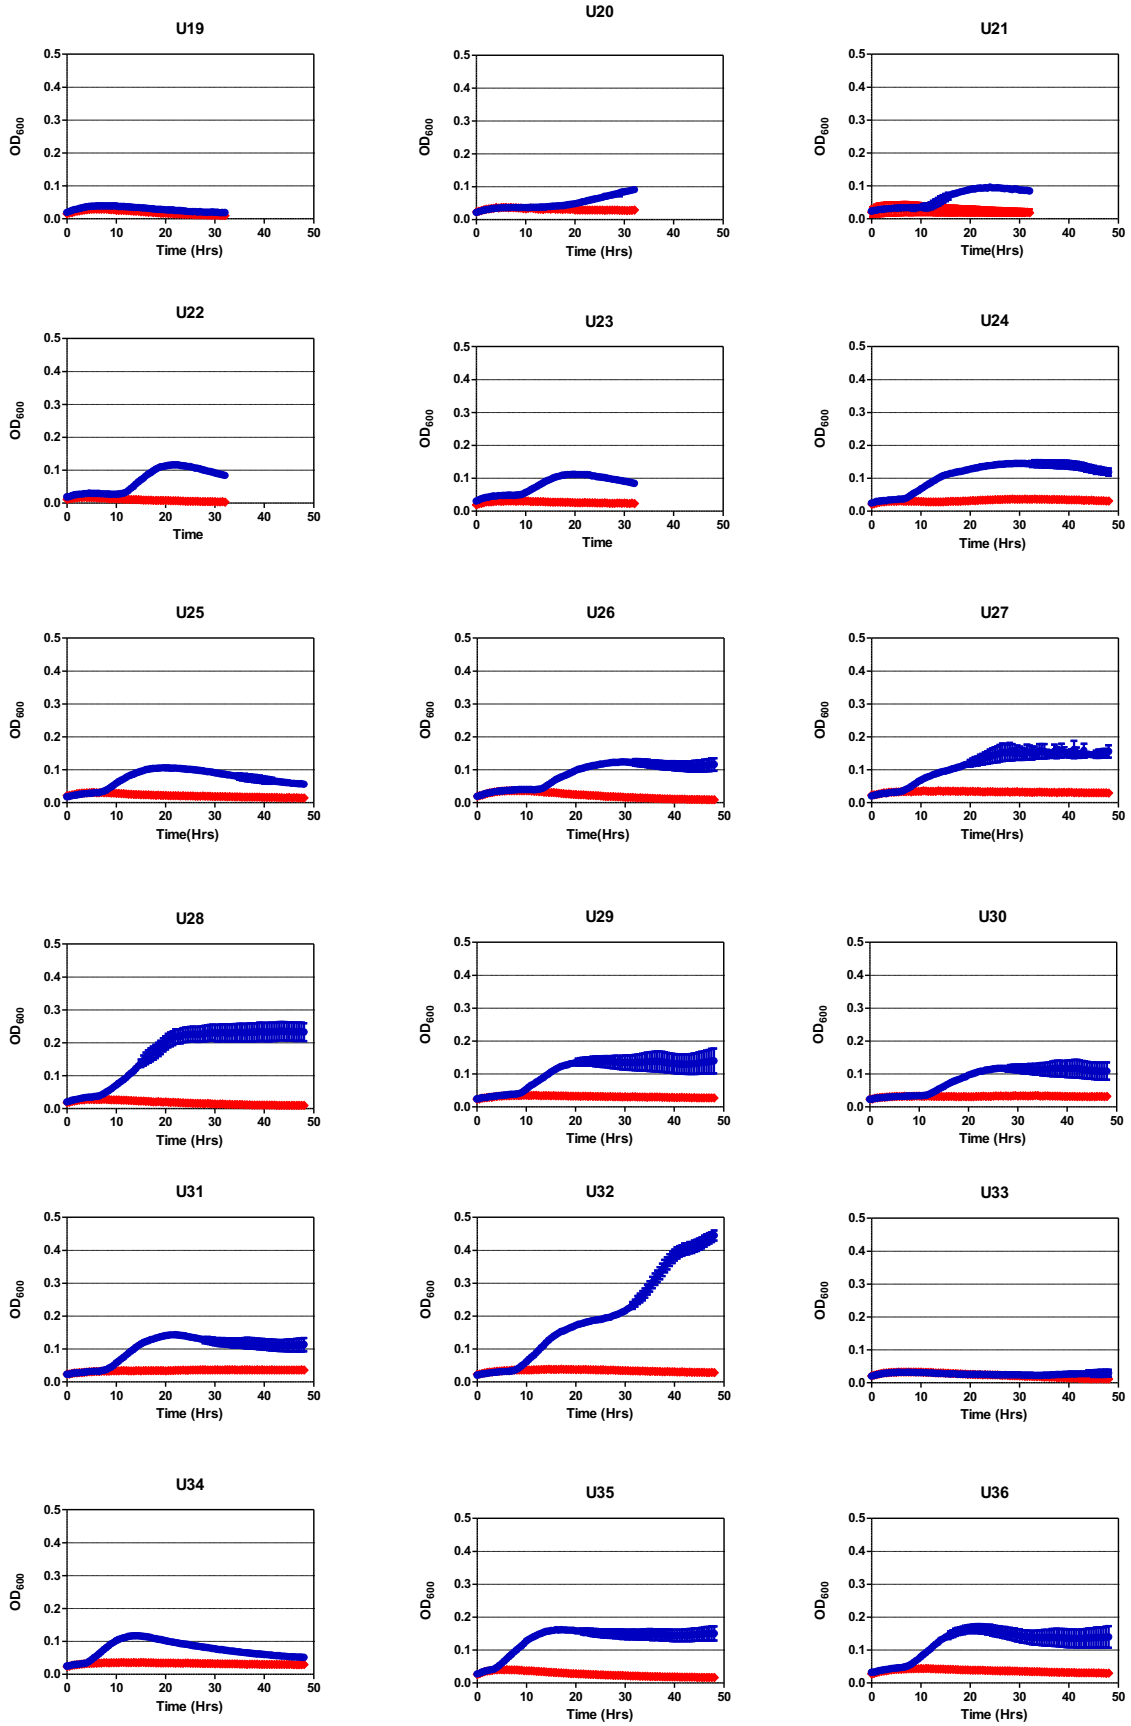

Figure S2 (continued). Utilisation of ethanolamine as a nitrogen source in minimal medium by urine isolates of *E. coli*

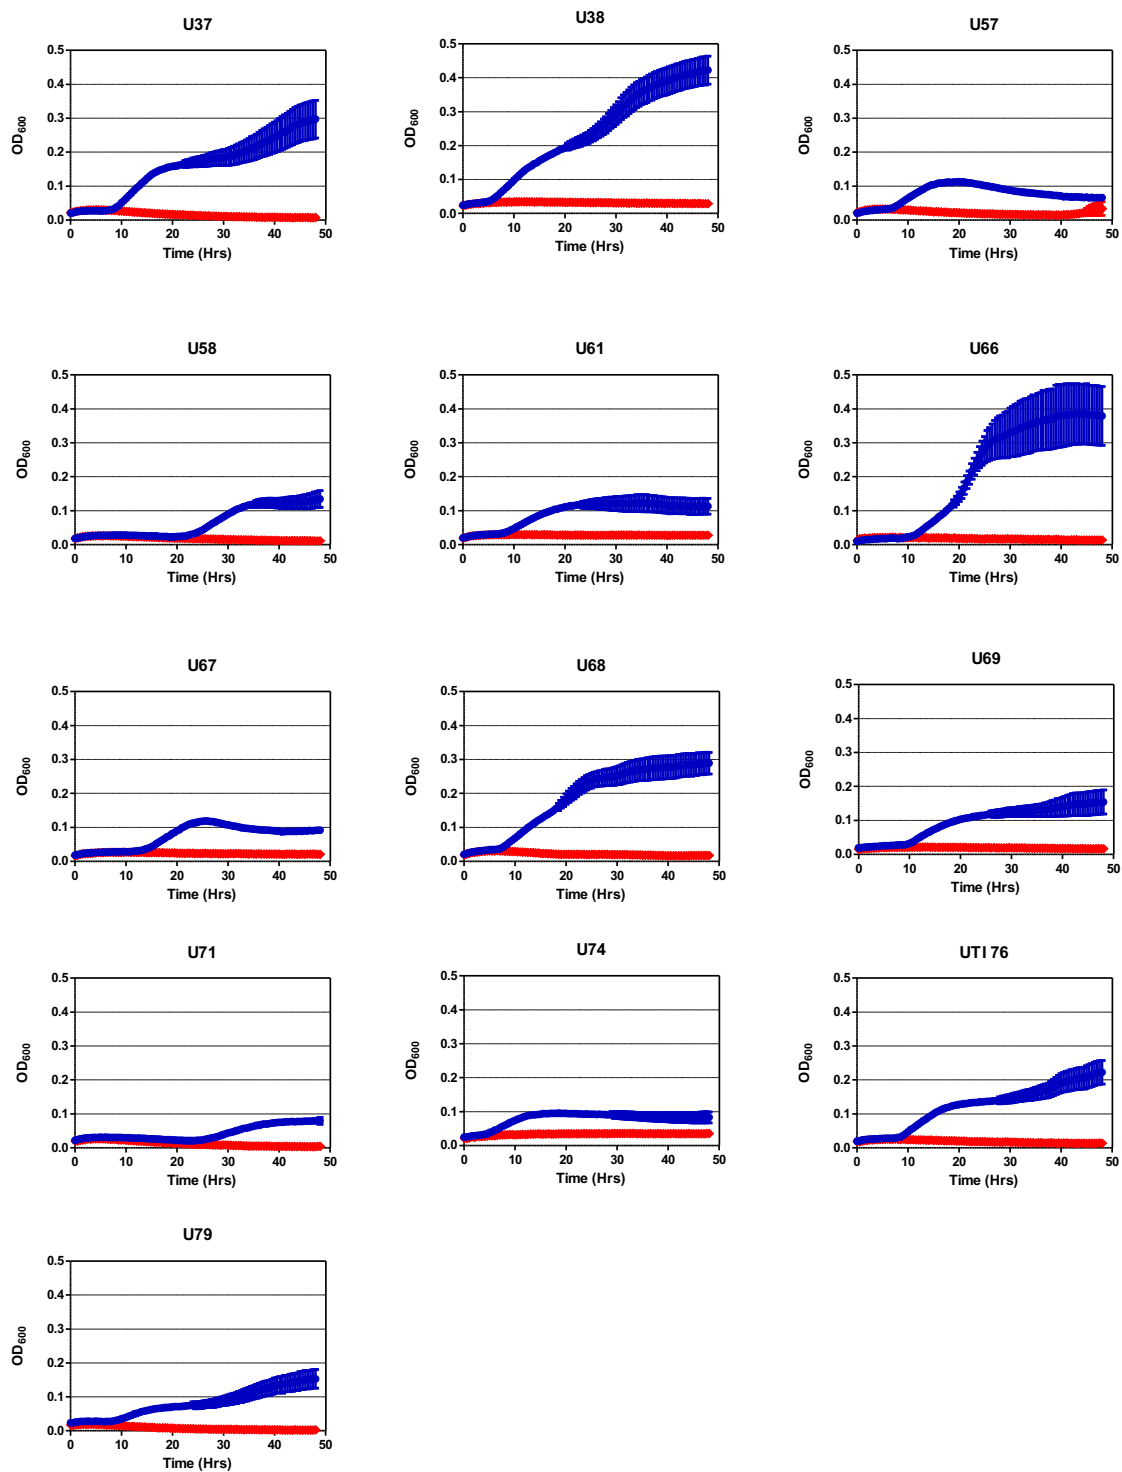

**Figure S2 (continued). Utilisation of ethanalamine as a nitrogen source in minimal medium by urine isolates of *E. coli***

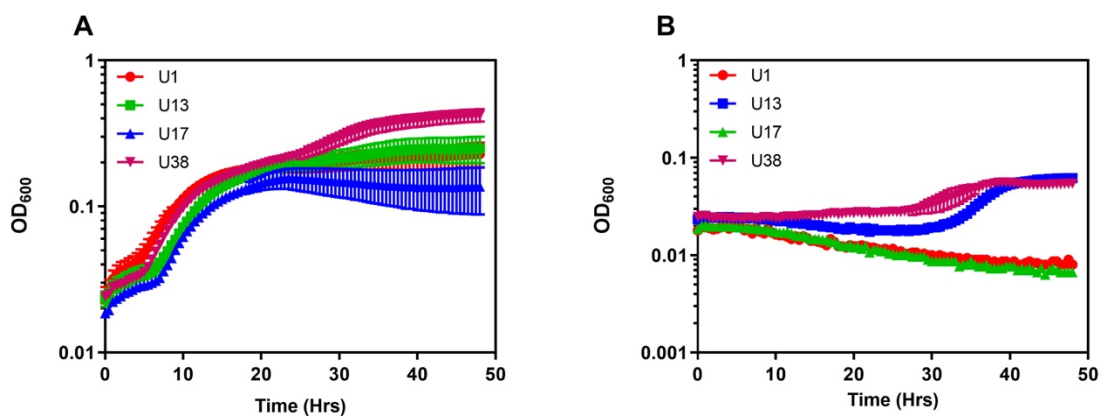

**Figure S3. Comparison of utilisation of ethanolamine as a nitrogen and carbon source for selected urinary isolates of *E. coli* in a microtitre plate assay**

A. Modified M9 minimal medium with ethanolamine 10 mM, glycerol 10 mM. B. Modified M9 minimal medium with ethanolamine 10 mM, ammonium chloride 10 mM.



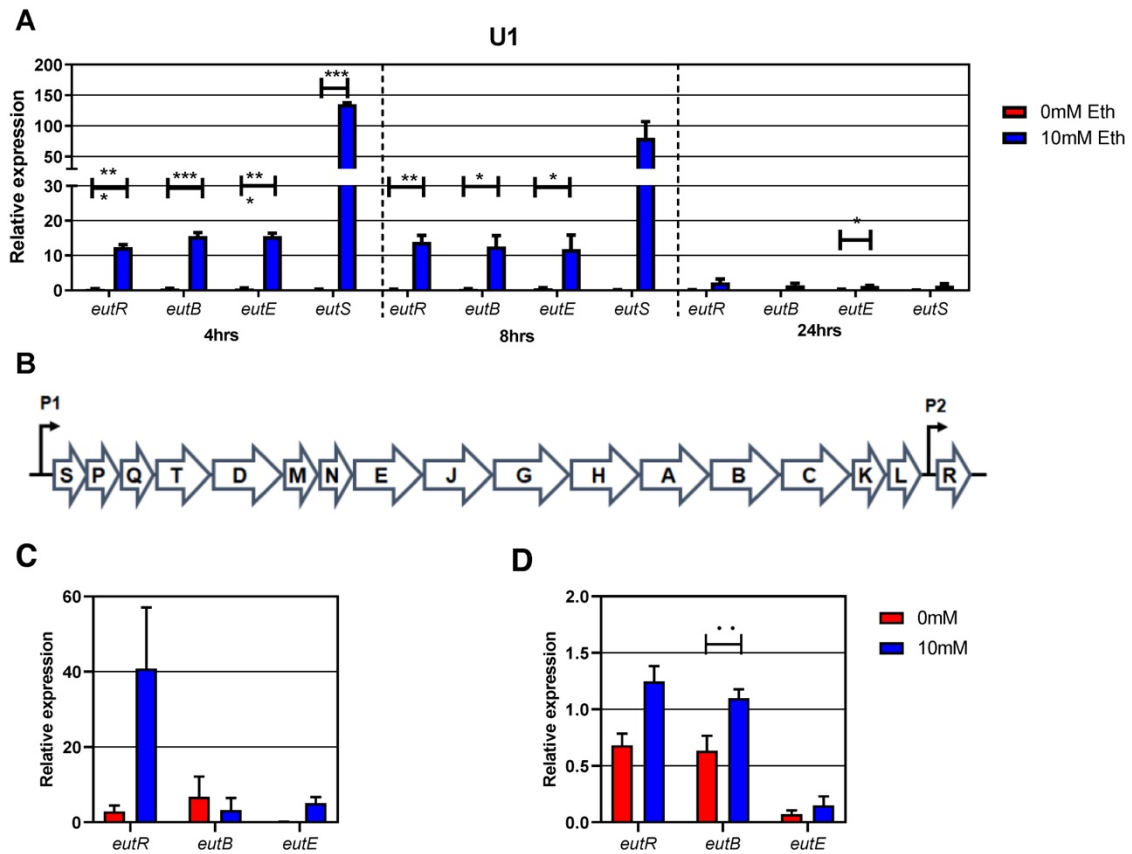

**Figure S4. RT-PCR shows upregulation of the *E. coli* U1 *eut* operon in AUM with addition of ethanolamine and does not show polarity of single gene *eutB* or *eutE* mutants**

The *eut* operon is upregulated on growth in AUM following the addition of 10mM ethanolamine. A. Relative expression of *eutR*, *eutB*, *eutE* and *eutS* in U1 grown in AUM with (blue) and without (red) 10mM ethanolamine. B. Schematic of the *eut* operon. Relative expression of *eutR*, *eutB* and *eutE* in C. U1 $\Delta$ *eutB* and D. U1 $\Delta$ *eutE* after 4 hours growth in AUM with and without 10mM ethanolamine. Expression is measured relative to the geometric mean of *rrsA* and *gyrA*. Values are Mean  $\pm$  SEM. N=3. \*  $p < 0.05$ , \*\* $p < 0.01$ , Mann-Whitney U-test.

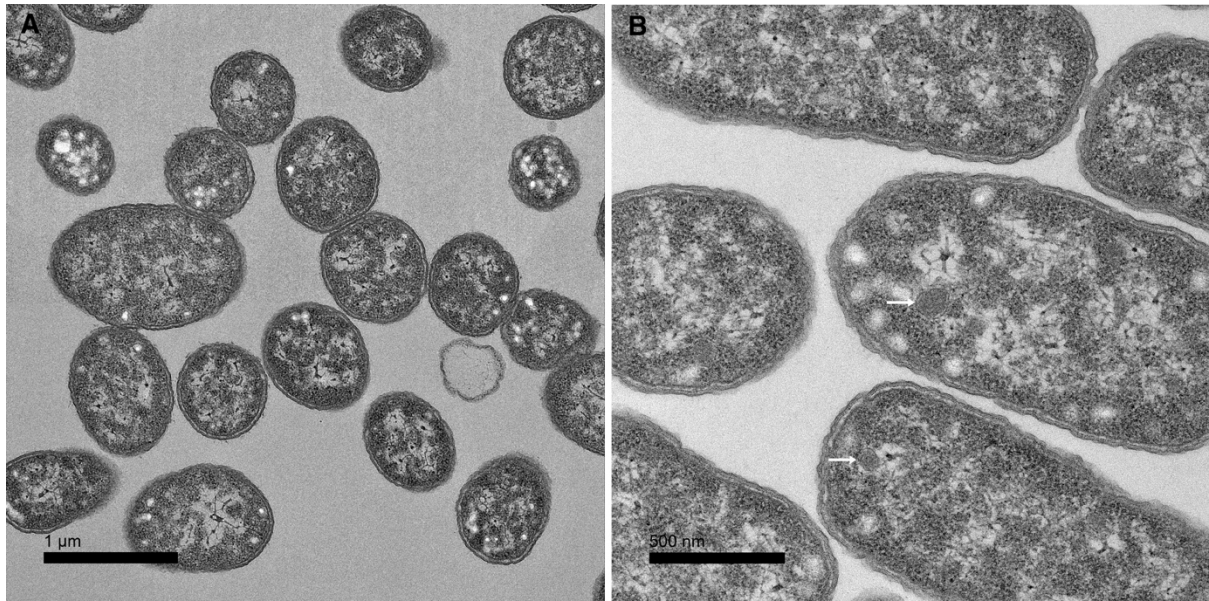

**Figure S5. Scanty bacterial microcompartments are visible in *E. coli* U1 when grown in M9 with ethanolamine**

Transmission electron microscopy of cells grown in modified M9 medium with 20 mM - glycerol for 8 hours. A. U1 in modified M9 with 20 mM ammonium chloride. B. U1 grown in modified M9 with 10mM ethanolamine. Arrows indicate microcompartments.

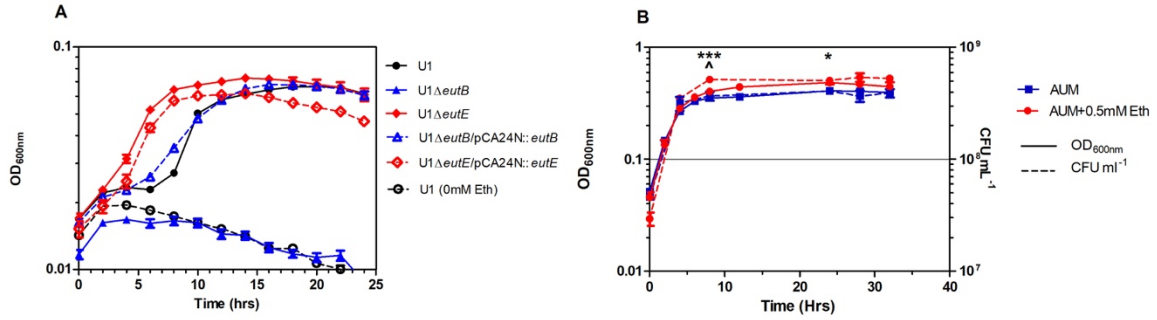

**Figure S6. *In vitro* growth advantage of UPEC strain U1 conferred by physiological levels of ethanolamine**

A. Nitrogen-limited M9 minimal medium with 0.5 mM ethanolamine 20 mM glycerol, control U1 growth without ethanolamine black dotted line. B. AUM (blue) and AUM with 0.5 mM ethanolamine (red). Solid lines OD<sub>600</sub> measurements, dotted lines CFU ml<sup>-1</sup> counts. Significant difference in OD<sub>600nm</sub> \*\*\* P<0.001 \* P<0.05. Significant difference in CFU ml<sup>-1</sup> ^ P<0.05.(Student's t-test)

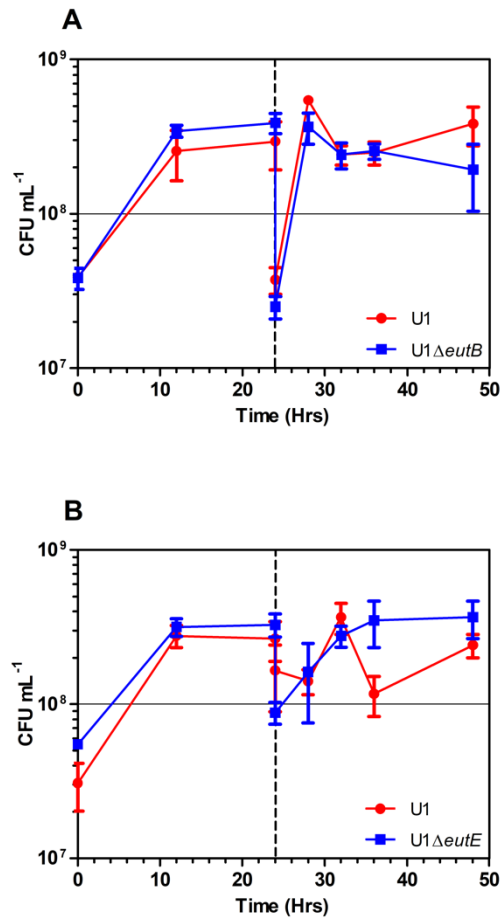

**Figure S7. Inactivation of *eut* operon genes does not reduce competitiveness of *E. coli* UPEC strain U1 in artificial urine medium containing 0.5 mM or less ethanolamine**  
 Competition of U1 vs A. U1 $\Delta$ eutB with 0.5mM ethanolamine B. U1 $\Delta$ eutE with 0.5mM ethanolamine. Vertical dotted line marks subcultures to fresh media at 24 hours. Values are Mean  $\pm$  SEM. N=3.

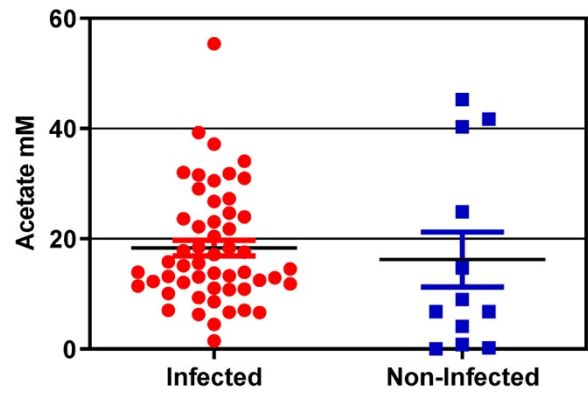

**Figure S8. Acetate is present in infected urine**  
Red infected urine, blue non-infected. HPLC assay.
